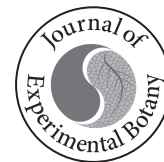

## FLOWERING NEWSLETTER REVIEW

# Flowering and trichome development share hormonal and transcription factor regulation

Luis Matías-Hernández<sup>1,2</sup>, Andrea E. Aguilar-Jaramillo<sup>1</sup>, Riccardo Aiese Cigliano<sup>2</sup>, Walter Sanseverino<sup>2</sup> and Soraya Pelaz<sup>1,3,\*</sup>

<sup>1</sup> Centre for Research in Agricultural Genomics, CSIC-IRTA-UAB-UB, Campus UAB, Bellaterra (Cerdanyola del Vallès) 08193 Barcelona, Spain

<sup>2</sup> Sequentia Biotech, Parc Científic de Barcelona (PCB), 08028 Barcelona, Spain

<sup>3</sup> ICREA (Institució Catalana de Recerca i Estudis Avançats), Barcelona, Spain

\* Correspondence: [soraya.pelaz@cragenomica.es](mailto:soraya.pelaz@cragenomica.es)

Received 3 August 2015; Accepted 24 November 2015

Editor: Lars Hennig, Swedish University of Agricultural Sciences

## Abstract

Gibberellins (GAs) and cytokinins (CKs) are plant hormones that act either synergistically or antagonistically during the regulation of different developmental processes. In *Arabidopsis thaliana*, GAs and CKs overlap in the positive regulation of processes such as the transition from the vegetative to the reproductive phase and the development of epidermal adaxial trichomes. Despite the fact that both developmental processes originate in the rosette leaves, they occur separately in time and space. Here we review how, as genetic and molecular mechanisms are being unraveled, both processes might be closely related. Additionally, this shared genetic network is not only dependent on GA and CK hormone signaling but is also strictly controlled by specific clades of transcription factor families. Some key flowering genes also control other rosette leaf developmental processes such as adaxial trichome formation. Conversely, most of the trichome activator genes, which belong to the MYB, bHLH and C2H2 families, were found to positively control the floral transition. Furthermore, three MADS floral organ identity genes, which are able to convert leaves into floral structures, are also able to induce trichome proliferation in the flower. These data lead us to propose that the spatio-temporal regulation and integration of diverse signals control different developmental processes, such as floral induction and trichome formation, which are intimately connected through similar genetic pathways.

**Key words:** Cytokinin, Floral induction, Flower organs, Gibberellins, Hormone signaling, Trichome formation.

## Introduction

Flowering is one of the most critical developmental steps to ensure species perpetuation. Floral induction must occur at an appropriate time of the year to ensure offspring survival. Early flowering may result in poor flower and seed production as plants do not recruit enough reserves for an energy-consuming process, while late flowering may lead to a robust plant, but perhaps may jeopardize fruit maturation. As the time for floral induction is critical, both late induction

and precocious flowering should be avoided. Consequently, plants constantly monitor environmental and endogenous signals to control their growth (Penfield, 2008). When plants are not competent to flower, they are insensitive to inductive environmental factors, while after the juvenile-to-adult transition plants reach the competence to respond to those signals (Bergonzi *et al.*, 2013; Huijser and Schmid, 2011). Indeed, flowering is controlled by a complex network of

interdependent genetic pathways that monitor and respond to both endogenous and environmental signals. Endogenous factors include hormones such as gibberellin (GA) and cytokinin (CK) (Mutasa-Göttgens and Hedden, 2009; Huijser and Schmid, 2011) and the age of the plant (Huijser and Schmid, 2011). Among the major environmental effectors are photoperiod, light intensity/quality and seasonal/daily changes in temperature (Thomas, 2006; Andrés and Coupland, 2012; Song *et al.*, 2012, 2013).

Plant fitness is an essential factor that may directly affect the success of plant reproduction. Not only environmental conditions but also insects can endanger proper plant development, including flower reproductive success. Herbivorous insect attacks can substantially decrease plant survival (Marquis and Alexander, 1992). Due to the fact that plant-insect encounters are not predictable, plants generally do not show high levels of resistance. However, plant plasticity creates the ability to respond rapidly to damage and to divert resistance resources for overcoming that damage (Agrawal, 2000). This plasticity most probably arose because plants are not able to move; consequently they have developed multiple physiological defense responses. Leaf trichomes are among these physiological defenses. Trichomes are epidermal protuberances that protect plants from the attack of herbivorous insects and develop even when plants are growing under optimal conditions (Traw and Bergelson, 2003). Interestingly, plasticity allows plants to respond to insect attacks by increasing the number and density of trichomes in new growing leaves, stems and flowers (Agrawal, 2000; Traw and Bergelson, 2003).

In many plant species trichomes are glandular multicellular structures able to produce, distribute and store toxic substances for protecting the plant against insect attacks (Olsson *et al.*, 2009), however *Arabidopsis thaliana* trichomes are unicellular and non-glandular structures (Hülkamp *et al.*, 2004). Despite not being able to store toxic substances, *Arabidopsis* trichome morphology, with a big size and three sharp terminations that develop on the adaxial surface of rosette leaves, reduce the access of herbivorous insects to leaf surface (Mauricio, 2005). But trichomes defend the plant not only against insects but also from other external factors such as an excess of UV light or high temperatures (Szymanski *et al.*, 2000; Schellmann *et al.*, 2007).

Adaxial rosette trichome initiation and development processes involve a complex genetic network. These include a multimeric complex, known as trichome activator complex, formed by a R2R3 MYB protein GLABROUS1 (*GL1*), two redundant trichome formation bHLH proteins, GLABRA3 (*GL3*) and ENHANCER OF GLABRA3 (*EGL3*), and a WD40 repeat containing protein, TRANSPARENT TESTA GLABRA 1 (*TTG1*) (Fig. 1) (Zhao *et al.*, 2008; Zhou *et al.*, 2011). Mutations in *GL1*, *TTG1*, and both *GL3/EGL3* result in *Arabidopsis* plants with a significant loss of trichomes (Payne *et al.*, 2000; Zhou *et al.*, 2011). In addition to that, this complex has not only a role in trichome initiation but also in later trichome development, as mutations in these genes result in smaller and less branched trichomes (Payne *et al.*, 2000).

It is accepted that the competency to enter the trichome pathway is limited to a few epidermal cells. Once an epidermal precursor is specified to acquire trichome cell fate, a mechanism of lateral inhibition towards the surrounding epidermal cells initiates (Langdale, 1998; Kirik *et al.*, 2004a) (Fig. 1). This lateral inhibition mechanism involves cell-to-cell communication. Indeed, trichome activation factors such as *GL3* and *TTG1* also turn on negative regulators of trichome initiation as *CAPRICE* (*CPC*) and *ENHANCER OF TRIPTYCHON AND CAPRICE 1* (*ETC1*), which subsequently move into neighboring epidermal pavement cells to prevent trichome formation (Zhao *et al.*, 2008; Balkunde *et al.*, 2010, 2011) (Fig. 1). In addition, these trichome positive regulators *GL3* and *TTG1* are also able to move among cells (Bouyer *et al.*, 2008; Savage *et al.*, 2008). *CPC* and *ETC1* are not the only trichome repressors in *Arabidopsis*, others have been described to act as trichome inhibitors contributing to an elaborated and well-regulated genetic network that determines which epidermal cell may – or may not – morphogenetically become a trichome (Langdale, 1998; Kirik *et al.*, 2004a). Interestingly, most of this trichome repressors including *CPC*, *ETC1*, *ETC2*, *ETC3*, *TRICHOMELESS 1* (*TCL1*), *TCL2* and *TRIPTYCHON* (*TRY*), belong to the R3-MYB TF family (Wang and Chen, 2014) (Fig. 1). Although *TRY* is the predominant member controlling trichome clustering on adaxial surface of rosette leaves (Schnittger *et al.*, 1998; Schellmann *et al.*, 2002), *CPC*, *ETC1*, *ETC2* and *ETC3* also regulate trichome development on leaves (Wada *et al.*, 1997, 2002; Esch *et al.*, 2004; Kirik *et al.*, 2004a, b; Tominaga *et al.*, 2008). However, *TCL1* and *TCL2* control trichome development mainly on inflorescence stems and pedicels (Wang *et al.*, 2007; Gan *et al.*, 2011). But not all these R3-MYB members are regulated by the trichome activator complex (*GL1-TTG1-GL3/EGL3*). Only *TRY*, *CPC*, *ETC1* and *ETC3* expressions are controlled by this multimeric complex in the rosette leaf, while *TCL1*, *TCL2* and *TRY* are regulated by an independent trichome pathway mediated by *microRNA156* (*miR156*) and *SQUAMOSA PROMOTER BINDING PROTEIN LIKE* (*SPL*) at least on the inflorescence stems (Yu *et al.*, 2010; Xue *et al.*, 2014). *miR156*-targeted *SPL* transcription factors not only play important roles in determining trichome initiation on the abaxial side of the rosette leaf but also on stems (Yu *et al.*, 2010; Xue *et al.*, 2014). Curiously enough, these genes also play a key role in controlling flowering through the age-dependent genetic pathway (Yu *et al.*, 2010; Xue *et al.*, 2014).

In the past decades, strong efforts have been made in the model plant *Arabidopsis* to unravel the different molecular and genetic mechanisms that regulate diverse cellular differentiation programs. Different results revealed that the network of transcriptional regulators affecting trichome proliferation are themselves affected by two plant hormones, GA and CK (Fig. 1), both of which are able to control and integrate diverse biological processes that occur at different cell levels (Schellmann *et al.*, 2002; Gan *et al.*, 2007; Zhao *et al.*, 2008). GA and CK are phytohormones required throughout plant development that contribute to and overlap in some plant developmental processes but they also have opposite

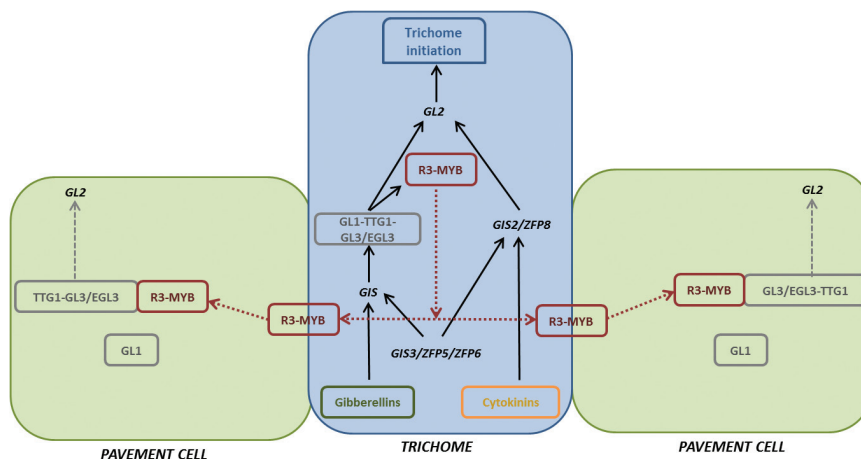

**Fig. 1.** Model for trichome and pavement cell fate specification in *Arabidopsis thaliana*. Trichome proliferation regulation is affected by gibberellins and cytokinins hormones through transcriptional regulation of the *GIS* clade genes: *GIS*, *GIS2*, and *ZFP8*. *GIS2* and *ZFP8* activate the trichome activator *GL2*, while *GIS* positively regulate some of the members of the trichome activation complex – *GL1*, *TTG1* and *GL3/EGL3* – that in turn activate *GL2* and, at the same time, *R3-MYB* repressor genes (black arrows). *R3-MYB* members that include *CPC*, *ETC1*, *ETC2*, *ETC3*, *TCL1*, *TCL2* and *TRY* act as repressors of trichome initiation. Some of these *R3-MYB* move to the neighboring cells (dashed red lines) to prevent trichome formation, where they compete with *GL1* for the interaction with *GL3* and/or *EGL3*, thus limiting the activity of the trichome activation complex, and consequently decreasing *GL2* expression (dashed arrow).

roles in others (Zhang *et al.*, 2003). For instance, GA and CK act antagonistically in leaf formation and meristem maintenance and GA counteracts the CK effect in epidermal differentiation (Gan *et al.*, 2007). However, both hormones have synergistic effects on the constitutive induction of epidermal defensive trichomes, floral induction, valve margins and senescence suggesting that genetic interactions may be shared between these two hormonal signaling pathways (Chien and Sussex, 1996; Perazza *et al.*, 1998; Corbesier *et al.*, 2003; Traw and Bergelson, 2003; Gan *et al.*, 2007; D'Aloia *et al.*, 2011; Marsch-Martinez *et al.*, 2012; Pattanaik *et al.*, 2014). The fact that phytohormones play independent and overlapping functions may imply that the spatio-temporal pattern and integration of diverse signals through downstream regulators are of great importance. Two possible strategies have been described so far to explain plant hormone integration. The first one uses a centralized system of upstream hormone signaling integrators, such as the DELLA family, that are able to control plant growth in combination with hormones such as GA, auxin, ethylene and abscisic acid (Silverstone *et al.* 1998; Fu and Harberd, 2003; Achard *et al.*, 2006). The second strategy uses more specialized regulators such as transcription factors that may act downstream controlling the specific gene networks of different developmental processes, but without excluding an upstream regulation (Nemhauser *et al.*, 2006). This review will focus on how a small number of proteins may use one or both strategies for regulating upstream and downstream steps of floral induction and trichome formation by integrating the control of hormone signaling and diverse genetic networks.

### Gibberellins and their positive role in flowering and trichome formation

GAs regulate different plant growth and developmental processes that span from seed germination to the control of

last processes in the plant life cycle, such as senescence, leaf expansion, hypocotyl and stem elongation (Fig. 2) (Chien and Sussex, 1996; Perazza *et al.*, 1998; Davis, 2009). The GA biosynthetic pathway follows a complex regulatory network that leads to the final production of the GA bioactive form, GA<sub>4</sub> (Mitchum *et al.*, 2006). Most of the genes encoding enzymes of the GA biosynthetic pathway have been well studied (Olszewski *et al.*, 2002). For example, *GA3OXIDASE 1* (*GA3OX1*) and *GA3OX2* encode enzymes that transform GA<sub>9</sub> into the bioactive GA<sub>4</sub>, but there are other important enzymes, such as *GA2OXIDASE*, which catabolizes an excess of GA<sub>4</sub> (Mitchum *et al.*, 2006). Therefore, a proper balance between the biosynthetic and catabolic enzymes is of essential importance for keeping a correct amount of GA.

In *Arabidopsis*, bioactive GAs promote floral induction as well as some other aspects of flower development, such as petal, stamen and viable pollen formation (Koornneef and van der Veen, 1980). GAs are also mobile signals that travel from the leaves to the shoot apical meristem (SAM) to induce the florigen *FLOWERING LOCUS T* (*FT*) and *SUPPRESSOR OF OVEREXPRESSION OF CONSTANS1* (*SOCI*) in order to trigger flowering (Fig. 3) (Corbesier *et al.*, 2007; Mathieu *et al.*, 2007). Flowering is induced by GA under both inductive long-days (LD) (16 h light/8 h dark) and non-inductive short-day (SD) (8 h light/16 h dark) conditions, although GAs have a stronger effect controlling floral induction under SD conditions (Wilson *et al.*, 1992; Blázquez *et al.*, 1998; Nilsson *et al.*, 1998). Under SD conditions, GA are able to activate the floral integrator *SOCI* and the floral meristem identity gene *LEAFY* (*LFY*) in the SAM (Blázquez *et al.*, 1998; Moon *et al.*, 2003) (Fig. 3). Trichome proliferation and branching are also among the processes controlled by GA (Smyth *et al.*, 1990; Dill and Sun, 2001). External GA applications increase trichome density in leaves and stems of *Arabidopsis* (Perazza *et al.*, 1998; Gan *et al.*, 2006).

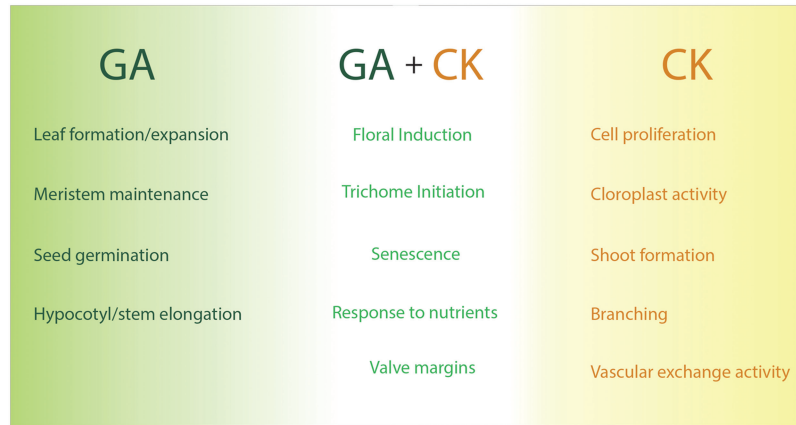

**Fig. 2.** Diagram showing GA- and CK-dependent overlapping and non-overlapping biological processes. GA and CK phytohormones regulate different plant growth and developmental processes that span from early stages during seed germination to the control of the final processes in the plant life cycle. Despite GA and CK acting antagonistically in several biological processes showed here, both hormones have synergistic effects on floral induction, trichome initiation, valve margins development, senescence and responses to nutrients availability.

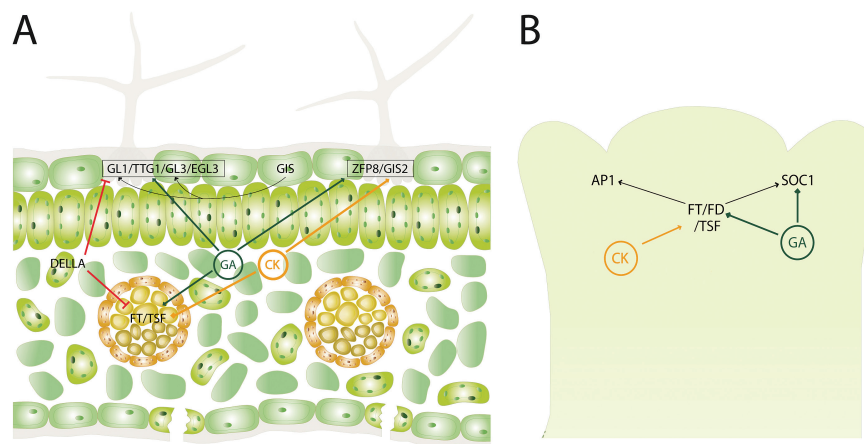

**Fig. 3.** The transcriptional regulatory network that affects floral and adaxial trichome induction at different organ, tissue and cell levels. (A) In rosette leaves, this complex network is partially controlled by GA and CK hormones that overlap in positively regulating the transcription of diverse trichome- and flowering-genes in either leaf mesophyll or epidermis. (B) Similar transcriptional regulation for the control of floral induction is found in the shoot apical meristem (SAM).

*GA3OX1* and *GA3OX2* functions overlap during *Arabidopsis* development, showing functional redundancy not only in stimulating flowering but also in trichome development (Mitchum, 2006). *ga3ox1 ga3ox2* double mutant plants are semi-dwarf, late flowering and bear a reduced number of trichomes on rosette leaves, stems and flowers (Koornneef and van der Veen, 1980; Chiang *et al.*, 1995; Mitchum *et al.*, 2006). In general, mutant plants in which GA biosynthesis genes have been knocked down and are unable to produce normal GA levels, produce leaves with fewer trichomes (Chien and Sussex, 1996; Traw and Bergelson, 2003). In fact, when GA are exogenously sprayed on an *Arabidopsis* wild-type plant, rosette leaf adaxial trichome production is significantly increased (Chien and Sussex, 1996), while plants treated with GA biosynthesis inhibitors such as paclobutrazol and uniconazole are not able to produce trichomes (Chien and Sussex, 1996; Perazza *et al.*, 1998).

In *Arabidopsis*, functional redundancy in GA signaling has been attributed not only to the GA biosynthetic enzymes but also to DELLA proteins (Gallego-Bartolomé

*et al.*, 2010). DELLA transcriptional regulators directly or indirectly repress the expression of GA-induced genes. The DELLA family encodes five members: *GIBBERELIC ACID INSENSITIVE (GAI)*, *REPRESSOR OF gai-3 (RGA)*, and three *RGA-like* genes (*RGL1*, *RGL2* and *RGL3*) (Eckardt, 2002; Wen and Chang, 2002; Achard *et al.*, 2003). DELLA proteins not only repress GA signaling, but they also modulate GA homeostasis by regulating the expression of some GA biosynthetic enzymes such as *GA3OX1* and *GA20OX1-DASE2*, and/or GA receptor genes such as *GIBBERELLIN INSENSITIVE DWARF 1a (GID1a)* and *GID1b* (Gallego-Bartolomé *et al.*, 2010). DELLA proteins act as repressors of GA-activated processes, consequently controlling floral induction. Among all the five members, *RGA* and *GAI* are the ones with a more important role in the transition to floral initiation (Dill and Sun, 2001; King *et al.*, 2001), while *RGA*, *RGL1* and *RGL2* have a more important role in flower and fruit development (Cheng *et al.*, 2004; Tyler *et al.*, 2004). The role of DELLA repressors in flowering control was determined by measuring the ability of different DELLA mutants



to rescue the strong phenotypes of the *gal-3* mutant. The *gal-3* mutant contains a large deletion in *GA REQUIRING 1* (*GAI*) gene, the enzyme that catalyzes the first committed step in GA biosynthesis (Sun and Kamiya, 1994). *rga* and *gai* null alleles are able to interact synergistically in order to rescue the normal vegetative growth and floral initiation in the *gal-3* mutant background (Dill and Sun, 2001; King et al., 2001), indicating that *RGA* and *GAI* act as major floral transition repressors. However, some evidence shows that *RGA*, *RGL1*, and *RGL2* are also involved, to a lesser extent, in modulating flowering and floral development (Tyler et al., 2004; Galvão et al., 2012).

In addition, diverse plant species overexpressing DELLA proteins show dwarfism and delayed flowering (Dill et al., 2004; Hamama et al., 2012). It is known that DELLAs also regulate flower development by partly repressing the expression of floral homeotic genes such as *APETALA 3* (*AP3*), *PISTILLATA* (*PI*), and *AGAMOUS* (*AG*) (Yu et al., 2004). Consequently, DELLA proteins are now universally considered as flowering inhibitors. Exogenous GA treatment is enough to restore the wild-type phenotype to *gal-3* in terms of floral induction and flower development (Wilson et al., 1992). Interestingly, this GA treatment is also able to restore the adaxial trichome number of glabrous *gal-3* rosette leaves to wild-type levels (Smyth et al., 1990). Later studies also show that DELLAs are directly involved in repressing trichome proliferation. Similar to members that control floral induction, *RGA* and *GAI*, play significant roles in trichome formation (Dill and Sun, 2001). *rga* and *gai* mutants are able to restore adaxial trichome initiation in the glabrous *gal-3* mutant plants (Dill and Sun, 2001). Furthermore, several trichome activator transcription factor genes, including *GL1* and *GL3*, are induced in these plants, while contrarily *RGA* over-expression represses *GL1* and *GL3* expression (Fig. 3). Indeed, *RGA* and/or *RGL2* proteins are able to interact with *GL1*, *GL3* and *EGL3* to repress the transcriptional function of this trichome activator complex (Qi et al., 2014).

## Cytokinins overlap with GA in floral induction and trichome formation

Cytokinins are involved in several aspects of plant growth and development. Firstly identified as factors that promote cell proliferation and shoot formation *in vitro*, CKs are found to activate cell-cycle genes in the leaf and interact with genetic regulators of stem cells in the SAM (Fig. 2) (Riou-Khamlichí et al., 1999; Leibfried et al., 2005). Additionally, CKs affect other important processes such as chloroplast or vascular exchange activity, branching and response to different nutrients as well as senescence (Fig. 2) (Yanai et al., 2005; Gordon et al., 2009). Decades ago, exogenous CK application was found to activate the floral transition of relatively old plants (Besnard-Wibaut, 1981; Dennis et al., 1996). Later on, applications of CK in the form of benzylaminopurine (BAP) treatments using a hydroponic system have confirmed that CK are clearly involved in the floral transition (D'Aloia et al., 2011). After BAP treatment, an up-regulation of

*APETALA1* (*API*) expression, a marker of floral meristems, is detected; and indeed floral meristems are initiated two days later (D'Aloia et al., 2011). CK have been proposed to act transmitting root-to-shoot signals during the floral transition (Kinet et al., 1993; Havelange et al., 2000). In fact, BAP application in the roots strongly promote floral induction in seven-week-old plants grown under SD conditions in the absence of other flowering stimulators such as extra GA, vernalization and/or LD photoperiod (D'Aloia et al., 2011). At the histological level, an increase of CK levels is found in the SAM of Arabidopsis plants at the moment of flowering, suggesting that CKs might be real regulators of floral induction (Corbesier et al., 2003).

CK biosynthetic enzymes have been well elucidated and are encoded by multigene families whose members are functionally redundant (Sakakibara et al., 2006; Hirose et al., 2008); this has always been an obstacle to genetically study in depth the role of CK in flowering. Luckily, physiological information has been obtained using genes that alter endogenous levels of CK, as *ALTERED MERISTEM PROGRAM 1* (*amp1*) overexpression results in early flowering plants (Werner et al., 2006). Contrarily, when enzymes that degrade CK, such as *CYTOKININ OXIDASE/DEHYDROGENASE* (*CKX*), are overexpressed, Arabidopsis plants flower later than wild-type plants (Werner et al., 2006). Genetically, CK applications are not able to activate the main florigen *FT*, but instead are able to promote the expression of its paralogue *TWIN SISTER of FT* (*TSF*) (Fig. 3) (D'Aloia et al., 2011). As *FT*, *TSF* protein interacts with *FLOWERING LOCUS D* (*FD*) and is activated by *CONSTANS* (*CO*), therefore *TSF* acts redundantly with *FT* to promote flowering (Michaels et al., 2005; Yamaguchi et al., 2005; Mathieu et al., 2007; Jang et al., 2009). Furthermore, CKs are also able to activate, at least in the SAM, *SOCI* and *FD* (Fig. 3) (D'Aloia et al., 2011). Indeed, it has been shown with BAP treatments on *tsf-1* and *soci-2* that both genes are necessary for flowering in response to CK. Consequently, a model is proposed in which CKs activate *TSF* in the leaf, *TSF* moves to the SAM, and through interaction with *FD*, similarly to the action of *FT*, *TSF* induces the transcription of *SOCI* and *API* (Fig. 3) (D'Aloia et al., 2011). Moreover, these results provide a clue of how redundant *FT* and *TSF* genes can be differentially regulated by distinct signals (D'Aloia et al., 2011).

CKs are also able to stimulate trichome formation. Plants treated with BAP produce more trichomes on cauline leaves, stems and flowers (Maes et al., 2008). The expression of many genes that act as trichome activators are stimulated by exogenous BAP not only on inflorescence organs but also to a lesser extent on the adaxial surface of rosette leaves (Gan et al., 2007). Furthermore, interesting overlapping roles are found for some enzymes that degrade CK, such as *CKX*, which repress both floral induction and trichome initiation. When *CKX* is overexpressed a reduction in the number of flower trichomes and a late flowering are observed (Werner et al., 2003).

However, phytohormones sometimes play antagonistic functions due to competition. Both GA and CK stimulate trichome formation and floral induction but, for

instance, exogenous GA applications may inhibit the effect of CK treatments as GAs are able to block CK signaling (Greenboim-Wainberg *et al.*, 2005). In contrast, exogenous CK applications increase the expression of genes that negatively regulate GA signaling (Brenner *et al.*, 2005). For example, this exhaustive control has been found to be essential for shoot meristem maintenance (Jasinski *et al.*, 2005; Yanai *et al.*, 2005). In the case of trichome proliferation, GA induction of trichomes is required throughout plant development; while CKs, although slightly affecting trichome formation in rosette leaves, are more specialized in trichome proliferation in upper inflorescences (Gan *et al.*, 2007).

## Flowering-time genes affect trichome initiation

Leaves perceive light and other environmental conditions and, as mentioned, different genetic pathways that respond to environmental and endogenous status tightly control floral induction from the leaf. These genetic pathways have been extensively studied in *Arabidopsis*, and they converge in the activation of the so-called floral pathway integrators *FT* and *SOC1* that induce flowering from the leaf vascular tissue (Takada and Goto, 2003; Fornara *et al.*, 2010; Wellmer and Riechmann, 2010). *FT* protein, which is part of the florigen (Kardailsky *et al.*, 1999; Kobayashi *et al.*, 1999), travels from the leaf to the SAM, where it triggers flowering after interaction with *FD* (Fig. 3) (Corbesier *et al.*, 2007; Jaeger and Wigge, 2007; Lin *et al.*, 2007; Mathieu *et al.*, 2007; Tamaki *et al.*, 2007).

Epidermal trichomes are present on both adaxial and abaxial surfaces of rosette leaves in *Arabidopsis*. The number of trichomes growing on the adaxial surface reaches high numbers from the first true rosette leaf, and keeps increasing in new leaves through development. As mentioned, the main reason for that increase in adaxial trichomes is for protection against predators, excess of UV-light and transpiration, while the presence and utility of abaxial trichomes seems to be rather different. Abaxial trichomes are used as a marker for the juvenile-to-adult phase transition because they only develop in the adult rosette leaves but not in juvenile leaves (Chien and Sussex, 1996; Telfer *et al.*, 1997; Yu *et al.*, 2010). Adaxial trichome analyses have hardly been done in important floral activator mutant backgrounds, but some published results show that the number of abaxial trichomes, but not the time of appearance, of the late flowering *ft-1* and *soc1-2* mutants were clearly and significantly reduced (Willmann and Poethig, 2011). The double mutant *ft-1 soc1-2* produced even fewer trichomes than the single mutants (Willmann and Poethig, 2011), implying that those flowering activators may also have a role in the induction of trichome formation. Moreover, *FLOWERING LOCUS C (FLC)*, a well-known MADS box gene that delays floral induction by repressing *FT* and *SOC1* (Hepworth *et al.*, 2002; Helliwell *et al.*, 2006; Searle *et al.*, 2006), also inhibit abaxial trichome formation. *f lc* mutants show a significant increase

in the abaxial trichome numbers independently of its role in flowering (Willmann and Poethig, 2011).

In addition to that, miR156-targeted *SPL* genes known to play key roles in the juvenile-to-adult transition as well as the plant phase transition towards flowering (Wang *et al.*, 2009; Wu *et al.*, 2009) have been found to control trichome initiation on the abaxial side of rosette leaves and stems (Yu *et al.*, 2010). They positively regulate the expression of some R3-MYB trichome repressors as *TCL1*, *TCL2* and *TRY* (Yu *et al.*, 2010; Xue *et al.*, 2014). Not only miR156 but also the negative regulator of the GA signaling pathway, DELLAs, interact with SPLs to control flowering (Yu *et al.*, 2012). Therefore, and similarly to other flowering-time genes described in this review, SPLs affect other developmental processes that include trichome proliferation (Yu *et al.*, 2010; Xue *et al.*, 2014).

## And ... all the way around: adaxial trichome activators affect floral transition

As previously described, GA and CK hormones play essential roles in trichome proliferation by positively controlling crucial downstream genes (Schellmann *et al.*, 2002; Gan *et al.*, 2006; Zhao *et al.*, 2008). The GA-dependent trichome pathway acts partially through *GLABROUS INFLORESCENCE STEMS (GIS)*, which positively regulates the trichome activation complex formed by *GL1*, *GL3*, *EGL3* and *TTG1* (Fig. 1) (Payne *et al.*, 2000; Zhao *et al.*, 2008). On the other hand, the CK-dependent trichome pathway is controlled by *GLABROUS INFLORESCENCE STEMS2 (GIS2)* and *ZINC FINGER PROTEIN (ZFP8)* (Fig. 1) (Gan *et al.*, 2007; Marsch-Martinez *et al.*, 2012). Both pathways converge to activate *GLABROUS 2 (GL2)*, the universal trichome activator (Payne *et al.*, 2000) (Fig. 1).

Mutations in *GL1*, *TTG1* and both *GL3/EGL3* result in *Arabidopsis* plants with a significant loss of trichomes (Payne *et al.*, 2000; Zhou *et al.*, 2011). In addition to that, this complex has not only a role in trichome initiation but also in later trichome development, as mutations in these genes result in smaller and less branched trichomes (Payne *et al.*, 2000).

Trichome proliferation regulation affected by both hormones was first found to be activated through transcriptional regulation of the *GIS* clade, a clade that belongs to the extensive C2H2 transcription factor family (Tague and Goodman, 1995; Zhou *et al.*, 2013). *GIS*, *GIS2* and *ZFP8* – all members of the *GIS* clade – are able, collectively and individually, to positively regulate *GL1* (Gan, 2006, 2007; Ishida *et al.*, 2008), but they have diverged in their responses to developmental and hormonal signals, playing different roles in regulating trichome initiation on diverse plant organs (Gan *et al.*, 2006, 2007). Although playing a major role in controlling CK signaling, *GIS2* and *ZFP8* were found to partially integrate GA and CK to control trichome formation in inflorescence organs (Gan *et al.*, 2006, 2007).

Despite the fact that the regulation of trichome initiation has been extensively studied, recent data have identified new transcription factors that belong to the *GIS* clade, which may

play redundant roles in integrating GA and CK signaling, such as *ZINC FINGER PROTEIN 5* and *6* (*ZFP5* and *ZFP6*) and *GLABROUS INFLORESCENCE STEMS3* (*GIS3*) trichome activators (Zhou *et al.*, 2011, 2013; Sun *et al.*, 2015). Similar to the phenotypes of mutants in any of the genes of the trichome activator complex, loss of GIS-clade function leads to a decrease in trichome formation on the adaxial surface of rosette leaves and/or inflorescence organs. In addition, overexpression of any of these proteins generates a high density of trichomes (Tague and Goodman, 1995; Gan *et al.*, 2006, 2007; Zhou *et al.*, 2011, 2013; Sun *et al.*, 2015).

Interestingly, and in comparison with some of the floral activators and floral repressors that show clear trichome phenotypes, an equivalent situation is found in several trichome mutants. Compared with wild-type plants, a significant delay in flowering has been reported in all trichome activation mutants analyzed. *gl1*, *gl3*, *gis*, *gis2* and *zfp8* show a strong reduction in adaxial trichome production, some of them being almost glabrous, and all flower late (Yan *et al.*, 2012). Among them, the flowering time of the *gl1* mutant is the most delayed, with an average increase of 62.5% in the number of days to flowering relative to control plants (Yan *et al.*, 2012). The single mutants *gis*, *gis2* and *zfp8* show a clear late flowering, with increases of 44.15%, 57.88% and 51.67%, respectively, in the number of days to flowering compared with wild-type *Columbia* (*Col-0*) ecotype plants. The *gl3* mutant in a *Landsberg erecta* (*Ler*) background shows a similar phenotype, with an average of 56.45% more days needed to flower than *Ler* wild-type plants (Yan *et al.*, 2012). In contrast, plants overexpressing *GIS* and *GIS2*, which produce more trichomes, show early flowering in comparison to wild-type plants, with a 28.34% and 36.65% of reduction in the number of days needed to flower (Yan *et al.*, 2012). Additionally, some of the R3-MYBs trichome repressors that control trichome formation in a GL2-independent manner (Wang and Chen, 2014), as *TRY* and *ETC3*, have been found to play pleiotropic effects such as delaying flowering. Indeed, single *try* and *cpl3* mutants flower earlier with a decrease of 5.31% and 23.13% in the number of days, respectively (Tomimaga *et al.*, 2008; Yan *et al.*, 2012).

Consequently, all these observations indicate that different developmental processes separated in time and space, i.e. adaxial trichome proliferation and floral induction, might be closely correlated and inter-connected through the CK and GA hormones (Fig. 3). Indeed, when publicly available high-throughput data was analyzed ([www.ebi.ac.uk/arrayexpress](http://www.ebi.ac.uk/arrayexpress)) similar results were obtained. Data used included diverse microarrays from Arabidopsis plants treated with GA and CK as well as plants with mutated key-genes for flower transition, trichome initiation, GA-or CK-biosynthesis pathways; specifically mutants in the *FT*, *CO*, *SPINDLY* (*SPY*), *GAI*, *RESPONSE REGULATOR 1* (*ARR1*), *GLI*, *GL3* and *EGL3* genes. A Venn diagram of the differentially expressed (DE) genes among the different microarrays shows that there is a small but still significant number of genes that overlap at least among three out of the four aspects compared in this review (Fig. 4).

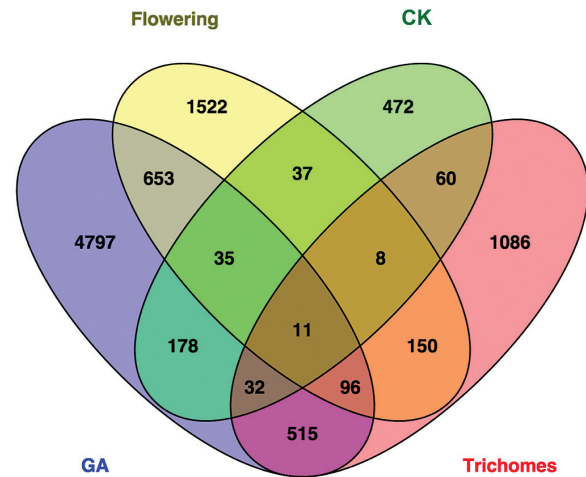

**Fig. 4.** Venn diagram showing the differentially expressed genes found among the diverse microarrays analyzed. High-throughput data used included microarrays from diverse Arabidopsis backgrounds that affect independently four biological processes: floral induction (yellow), trichome initiation (red), CK- (green) and GA-signaling (blue). A significant number of genes overlap at least among three out of the four aspects compared.

### Floral organ identity genes repress inflorescence trichome initiation

This review is focused mainly on developmental processes that originate in the rosette leaves such as trichome initiation and flowering, but Arabidopsis trichomes are also present on inflorescence stems and flowers. In flowering species, floral organs, including sepals, petals, stamens and carpels are specified and controlled by floral organ identity genes (Bowman *et al.*, 1989; Coen and Meyerowitz, 1991; Pelaz *et al.*, 2000, 2001; Theissen, 2002; Ditta *et al.*, 2004). *AG*, a gene involved in stamen and carpel development (Yanofsky *et al.*, 1990; Drews *et al.*, 1991), has recently been found to be involved in repressing trichome proliferation on floral organs (Ó'Maoiléidigh *et al.*, 2013). Computational analyses using microarray data of early stage *ag* mutant flowers revealed that *AG* represses transcripts that encode proteins with several essential functions in rosette leaf development including trichome formation (Ó'Maoiléidigh *et al.*, 2013). Indeed, inducible artificial miRNA plant lines that silence *AG* (*amiRAG*) control trichome formation through direct regulation of some important trichome initiation genes, and show increased levels of the trichome initiation activators *GLI* and *ZFP8* (Larkin *et al.*, 1994; Schellmann *et al.*, 2002), while the trichome initiation repressors *CPC* and *TCL1* (Gan *et al.*, 2007; Wang *et al.*, 2007) are repressed (Ó'Maoiléidigh *et al.*, 2013). Phenotypical analyses showed that these *amiRAG* knock-down lines produce flowers with aberrant-shaped carpels that develop branched trichomes on their valves (Bowman *et al.*, 1989; Ó'Maoiléidigh *et al.*, 2013). The combinatorial function of *AG*, *AP3* and *PI* proteins is widely known (Riechmann *et al.*, 1996; Honma and Goto, 2001; Theissen, 2002; Wuest *et al.*, 2012). ChIP-seq data analyses from *AP3* and *PI* (Wuest *et al.*, 2012) revealed that both proteins are able to bind *in vivo* to the same trichome regulators targeted by *AG*, confirming



their combinatorial functions (Ó'Maoiléidigh *et al.*, 2013). Indeed, when all *AG*, *AP3* and *PI* are simultaneously knocked down, anthers of these mutant flowers develop branched and unbranched trichomes (Wuest *et al.*, 2012; Ó'Maoiléidigh *et al.*, 2013). Interestingly, these aberrant flowers, although slightly weaker, resemble those of plants overexpressing *GL1* trichome activator in the trichome repressor *try* mutant background (Schnittger *et al.*, 1998). *TRY* is able to control trichome initiation not only in rosette leaves but also in flowers (Schnittger *et al.*, 1998; Wellmer *et al.*, 2006). Similar to its *GL2*-independent function in leaves (Wang and Chen, 2014), *TRY* suppresses trichome proliferation in the flower independently of *AG* (Ó'Maoiléidigh *et al.*, 2013).

## Conclusions

Using mutant analyses, gene expression studies and overlapping transcriptional regulatory interactions, great effort has been made to unravel the diverse molecular and genetic mechanisms that regulate different cellular differentiation programs in *Arabidopsis*. Data reveal that a network of transcriptional regulators is able to affect and be affected by GA and CK hormones at different organ, tissue and cell levels.

Indeed, in this review we show that the proper control of cell fate is of central importance and it is well coordinated in apparently distant developmental processes such as floral induction and epidermal trichome development. Both processes happen separately in time and most probably in space, but are interconnected, sharing a small genetic network on GA and CK hormone signaling. Several transcription factors belonging to the MYB, bHLH, C2H2, MADS families as well as DELLA proteins control both separated processes, floral transition and rosette leaf adaxial trichome proliferation, in response to different hormonal and developmental cues. Significant genetic interactions are shared between these two developmental processes. Here, we elucidate on how some important floral key activators and repressors control not only floral transition from the rosette leaf but also other rosette leaf developmental processes such as epidermal trichome formation. However, most of the analyzed trichome activator genes also positively control later developmental processes such as floral induction. In addition to that, as floral organs are essentially modified leaves through the action of different floral organ identity genes, these genes are also able to repress trichome proliferation in the flower. All these described transcription factors regulate floral induction and trichome formation processes by integrating diverse genetic networks and/or the control of hormone signaling. Therefore, while further investigation is necessary in order to dissect this complex regulatory network, these data lead us to suggest that the spatio-temporal regulation pattern and integration of signals of downstream regulators are of great importance; and consequently, different developmental processes separated in time, such as adaxial trichome proliferation and floral induction, might be closely correlated.

## Acknowledgements

We thank Paula Suárez-López for critical reading and suggestions to improve the manuscript. Soraya Pelaz's research group has been recognized as a Consolidated Research Group by the Catalan Government (2014 SGR 1406). This work was supported by a MINECO/FEDER grant (BFU2012-33746).

## Appendix

Expression information of the genes responding to GA, CK, flowering and trichome formation was obtained by the analysis of the following public microarray studies (<http://www.ebi.ac.uk/arrayexpress/>): E-GEOD-576, E-GEOD-7353, E-GEOD-8739, E-GEOD-8785, E-GEOD-12522, E-GEOD-12551, E-GEOD-39384, E-GEOD-44919, E-MEXP-344, E-MEXP-2270, E-MEXP-3362. For the datasets E-GEOD-7353, E-GEOD-8739, E-GEOD-8785, E-GEOD-12551 the lists of differentially expressed genes were taken directly from the published papers. E-GEOD-576 dataset was analyzed with the GEO2R tool from the NCBI with the default options. CEL files from E-GEOD-12522 and E-MEXP-2270 were downloaded; data were normalized with RMA using the R *grma* package (*R package version 2.40.0*). Then normalized data were used for differential expression test with the R package *limma* (Ritchie *et al.*, 2015). Probe expression values from the dataset E-MEXP-344 were analyzed with a *t*-test to identify the differentially expressed ones. Finally, E-GEOD-44919 and E-MEXP-3362 data were downloaded and *limma* was used to perform background correction (*normexp*), within normalization (*loess*) and between array normalization (*quartile*).

The differentially expressed genes coming from the four groups of experiments were joined and compared through a Venn diagram. An interactive tool for comparing lists with Venn diagrams was used (<http://bioinfo.gp.cnb.csic.es/tools/venny/index.html>).

## References

- Achard P, Cheng H, De Grauwe L, Decat J, Schoutteten H, Moritz T, Van Der Straeten D, Peng J, Harberd NP. 2006. Integration of plant responses to environmentally activated phytohormonal signals. *Science* **311**, 91–94.
- Achard P, Vriegen WH, Van Der Straeten D, Harberd NP. 2003. Ethylene regulates *Arabidopsis* development via the modulation of DELLA protein growth repressor function. *Plant Cell* **15**, 2816–2825.
- Agrawal AA. 2000. Communication between plants: this time it's real. *Trends in Ecology & Evolution* **15**, 444–446.
- Andres F, Coupland G. 2012. The genetic basis of flowering responses to seasonal cues. *Nature Review Genetics* **13**, 627–639.
- Balkunde R, Bouyer D, Hulskamp M. 2011. Nuclear trapping by *GL3* controls. *Development* **138**, 5039–5048.
- Balkunde R, Pesch M, Hulskamp M. 2010. Trichome patterning in *Arabidopsis thaliana* from genetic to molecular models. *Current Topics in Developmental Biology* **91**, 299–321.
- Bergonzi S, Albani MC, Ver Loren van Themaat E, Nordstrom KJ, Wang R, Schneeberger K, Moerland PD, Coupland G. 2013. Mechanisms of age-dependent response to winter temperature in perennial flowering of *Arabis alpina*. *Science* **340**, 1094–1097.
- Besnard-Wibaut C. 1981. Effectiveness of gibberellins and 6-benzyladenine on flowering of *Arabidopsis thaliana*. *Physiologia Plantarum* **53**, 205–212.
- Blázquez MA, Green R, Nilsson O, Sussman MR, Weigel D. 1998. Gibberellins promote flowering of *Arabidopsis* by activating the *LEAFY* promoter. *Plant Cell* **10**, 791–800.



- Bowman JL, Smyth DR, Meyerowitz EM.** 1989. Genes directing flower development in *Arabidopsis*. *Plant Cell* **1**, 37–52.
- Bouyer D, Geier F, Kragler F, Schnittger A, Pesch M, Wester K, Balkunde R, Timmer J, Fleck C, Hülkamp M.** 2008. Two-dimensional patterning by a trapping/depletion mechanism: the role of TTG1 and GL3 in *Arabidopsis* trichome formation. *PLoS Biology* **6**, e141.
- Brenner WG, Romanov GA, Kollmer I, Burkle L, Schumling T.** 2005. Immediate-early and delayed cytokinin response genes of *Arabidopsis thaliana* identified by genome-wide expression profiling reveal novel cytokinin-sensitive processes and suggest cytokinin action through transcriptional cascades. *Plant Journal* **44**, 314–333.
- Coen ES, Meyerowitz EM.** 1991. The war of the whorls: genetic interactions controlling flower development. *Nature* **353**, 31–37.
- Corbesier L, Prinsen E, Jacquard A, Lejeune P, Van Onckelen H, Perilleux C, Bernier G.** 2003. Cytokinin levels in leaves, leaf exudate and shoot apical meristem of *Arabidopsis thaliana* during floral transition. *Journal of Experimental Botany* **54**, 2511–2517.
- Corbesier L, Vincent C, Jang S, et al.** 2007. FT protein movement contributes to long-distance signaling in floral induction of *Arabidopsis*. *Science* **316**, 1030–1033.
- Cheng H, Qin L, Lee S, Fu X, Richards DE, Cao D, Luo D, Harberd NP, Peng J.** 2004. Gibberellin regulates *Arabidopsis* floral development via suppression of DELLA protein function. *Development* **131**, 1055–1064.
- Chiang HH, Hwang I, Goodman HM.** 1995. Isolation of the *Arabidopsis* GA4 locus. *Plant Cell* **7**, 195–201.
- Chien JC, Sussex IM.** 1996. Differential regulation of trichome formation on the adaxial and abaxial leaf surfaces by gibberellins and photoperiod in *Arabidopsis thaliana* (L.) Heynh. *Plant Physiology* **111**, 1321–1328.
- D'Aloia M, Bonhomme D, Bouche F, Tamseddak K, Ormenese S, Torti S, Coupland G, Perilleux C.** 2011. Cytokinin promotes flowering of *Arabidopsis* via transcriptional activation of the FT paralogue TSF. *Plant Journal* **65**, 972–979.
- Davis SJ.** 2009. Integrating hormones into the floral-transition pathway of *Arabidopsis thaliana*. *Plant, Cell & Environment* **32**, 1201–1210.
- Dennis ES, Finnegan EJ, Bilodeau P, Chaudhury A, Genger R, Helliwell CA, Sheldon CC, Bagnall DJ, Peacock WJ.** 1996. Vernalization and the initiation of flowering. *Seminars in Cell and Developmental Biology* **7**, 441–448.
- Dill A, Sun T.** 2001. Synergistic derepression of gibberellin signaling by removing RGA and GAI function in *Arabidopsis thaliana*. *Genetics* **159**, 777–785.
- Dill A, Thomas SG, Hu J, Steber CM, Sun TP.** 2004. The *Arabidopsis* F-box protein SLEEPY1 targets gibberellin signaling repressors for gibberellin-induced degradation. *Plant Cell* **16**, 1392–1405.
- Ditta G, Pinyopich A, Robles P, Pelaz S, Yanofsky MF.** 2004. The SEP4 gene of *Arabidopsis thaliana* functions in floral organ and meristem identity. *Current Biology* **14**, 1935–1940.
- Drews GN, Bowman JL, Meyerowitz EM.** 1991. Negative regulation of the *Arabidopsis* homeotic gene AGAMOUS by the APETALA2 product. *Cell* **65**, 991–1002.
- Eckardt NA.** 2002. Foolish seedlings and DELLA regulators: the functions of rice SLR1 and *Arabidopsis* RGL1 in GA signal transduction. *Plant Cell* **14**, 1–5.
- Esch JJ, Chen MA, Hillestad M, Marks MD.** 2004. Comparison of *TRY* and the closely related *At1g01380* gene in controlling *Arabidopsis* trichome patterning. *Plant Journal* **40**, 860–869.
- Fornara F, de Montaigu A, Coupland G.** 2010. SnapShot: control of flowering in *Arabidopsis*. *Cell* **141**, 550–552.
- Fu X, Harberd NP.** 2003. Auxin promotes *Arabidopsis* root growth by modulating gibberellin response. *Nature* **421**, 740–743.
- Gallego-Bartolome J, Minguet EG, Marin JA, Prat S, Blázquez MA, Alabadi D.** 2010. Transcriptional diversification and functional conservation between DELLA proteins in *Arabidopsis*. *Molecular Biology and Evolution* **27**, 1247–1256.
- Galvão VC, Horrer D, Kuttner F, Schmid M.** 2012. Spatial control of flowering by DELLA proteins in *Arabidopsis thaliana*. *Development* **139**, 4072–4082.
- Gan L, Xia K, Chen JG, Wang S.** 2011. Functional characterization of TRICHOMELESS2, a new single repeat R3MYB transcription factor in the regulation of trichome patterning in *Arabidopsis*. *BMC Plant Biology* **11**, 176–187.
- Gan Y, Kumimoto R, Liu C, Ratcliffe O, Yu H, Broun P.** 2006. GLABROUS INFLORESCENCE STEMS modulates the regulation by gibberellins of epidermal differentiation and shoot maturation in *Arabidopsis*. *Plant Cell* **18**, 1383–1395.
- Gan Y, Liu C, Yu H, Broun P.** 2007. Integration of cytokinin and gibberellin signalling by *Arabidopsis* transcription factors GIS, ZFP8 and GIS2 in the regulation of epidermal cell fate. *Development* **134**, 2073–2081.
- Gordon SP, Chickarmane VS, Ohno C, Meyerowitz EM.** 2009. Multiple feedback loops through cytokinin signaling control stem cell number within the *Arabidopsis* shoot meristem. *Proceedings of the National Academy of Sciences, USA* **106**, 16529–16534.
- Greenboim-Wainberg Y, Maymon I, Borochoy R, Alvarez J, Olszewski N, Ori N, Eshed Y, Weiss D.** 2005. Cross talk between gibberellin and cytokinin: the *Arabidopsis* GA response inhibitor SPINDLY plays a positive role in cytokinin signaling. *Plant Cell* **17**, 92–102.
- Hamama L, Naouar A, Gala R, et al.** 2012. Overexpression of RoDELLA impacts the height, branching, and flowering behaviour of *Pelargonium x domesticum* transgenic plants. *Plant Cell Reports* **31**, 2015–2029.
- Havelange A, Lejeune P, Bernier G.** 2000. Sucrose/cytokinin interaction in *Sinapis alba* at floral induction: a shoot-to-root-to-shoot physiological loop. *Physiologia Plantarum* **109**, 343–350.
- Helliwell CA, Wood CC, Robertson M, James Peacock W, Dennis ES.** 2006. The *Arabidopsis* FLC protein interacts directly in vivo with SOC1 and FT chromatin and is part of a high-molecular-weight protein complex. *Plant Journal* **46**, 183–192.
- Hepworth SR, Valverde F, Ravenscroft D, Mouradov A, Coupland G.** 2002. Antagonistic regulation of flowering-time gene *SOC1* by CONSTANS and FLC via separate promoter motifs. *EMBO Journal* **21**, 4327–4337.
- Hirose N, Takei K, Kuroha T, Kamada-Nobusada T, Hayashi H, Sakakibara H.** 2008. Regulation of cytokinin biosynthesis, compartmentalization and translocation. *Journal of Experimental Botany* **59**, 75–83.
- Honma T, Goto K.** 2001. Complexes of MADS-box proteins are sufficient to convert leaves into floral organs. *Nature* **409**, 525–529.
- Huijser P, Schmid M.** 2011. The control of developmental phase transitions in plants. *Development* **138**, 4117–4129.
- Hülkamp M.** 2004. Plant trichomes: a model for cell differentiation. *Nature Reviews Molecular Cell Biology* **5**, 471–480.
- Ishida T, Kurata T, Okada K, Wada T.** 2008. A genetic regulatory network in the development of trichomes and root hairs. *Annual Review of Plant Biology* **59**, 365–386.
- Jaeger KE, Wigge PA.** 2007. FT protein acts as a long-range signal in *Arabidopsis*. *Current Biology* **17**, 1050–1054.
- Jang S, Torti S, Coupland G.** 2009. Genetic and spatial interactions between FT, TSF and SVP during the early stages of floral induction in *Arabidopsis*. *Plant Journal* **60**, 614–625.
- Jasinski S, Piazza P, Craft J, Hay A, Woolley L, Rieu I, Phillips A, Hedden P, Tsiantis M.** 2005. KNOX action in *Arabidopsis* is mediated by coordinate regulation of cytokinin and gibberellin activities. *Current Biology* **15**, 1560–1565.
- Kardailsky I, Shukla VK, Ahn JH, Dagenais N, Christensen SK, Nguyen JT, Chory J, Harrison MJ, Weigel D.** 1999. Activation tagging of the floral inducer FT. *Science* **286**, 1962–1965.
- Kinet JM, Lejeune P, Bernier G.** 1993. Shoot-root interactions during floral transition: a possible role for cytokinins. *Environmental and Experimental Botany* **33**, 459–469.
- King KE, Moritz T, Harberd NP.** 2001. Gibberellins are not required for normal stem growth in *Arabidopsis thaliana* in the absence of GAI and RGA. *Genetics* **159**, 767–776.
- Kirik V, Simon M, Hülkamp M, Schiefelbein J.** 2004a. The *ENHANCER OF TRY AND CPC1* gene acts redundantly with *TRIPTYCHON* and *CAPRICE* in trichome and root hair cell patterning in *Arabidopsis*. *Developmental Biology* **268**, 506–513.
- Kirik V, Simon M, Wester K, Schiefelbein J, Hülkamp M.** 2004b. *ENHANCER OF TRY AND CPC 2 (ETC2)* reveals redundancy in the region-specific control of trichome development of *Arabidopsis*. *Plant Molecular Biology* **55**, 389–398.

- Kobayashi Y, Kaya H, Goto K, Iwabuchi M, Araki T.** 1999. A pair of related genes with antagonistic roles in mediating flowering signals. *Science* **286**, 1960–1962.
- Koorneef M, van der Veen JH.** 1980. Induction and analysis of gibberellin sensitive mutants in *Arabidopsis thaliana* (L.) heynh. *Theoretical and Applied Genetics* **58**, 257–263.
- Langdale JA.** 1998. Cellular differentiation in the leaf. *Current Opinion in Cell Biology* **10**, 734–738.
- Larkin JC, Oppenheimer DG, Lloyd AM, Papparozzi ET, Marks MD.** 1994. Roles of the GLABROUS1 and TRANSPARENT TESTA GLABRA genes in arabidopsis trichome development. *Plant Cell* **6**, 1065–1076.
- Leibfried A, To JP, Busch W, Stehling S, Kehle A, Demar M, Kieber JJ, Lohmann JU.** 2005. WUSCHEL controls meristem function by direct regulation of cytokinin-inducible response regulators. *Nature* **438**, 1172–1175.
- Lin MK, Belanger H, Lee YJ, et al.** 2007. FLOWERING LOCUS T protein may act as the long-distance florigenic signal in the cucurbits. *Plant Cell* **19**, 1488–1506.
- Maes L, Inze D, Goossens A.** 2008. Functional specialization of the TRANSPARENT TESTA GLABRA1 network allows differential hormonal control of laminal and marginal trichome initiation in *Arabidopsis* rosette leaves. *Plant Physiology* **148**, 1453–1464.
- Marquis RJ, Alexander HM.** 1992. Evolution of resistance and virulence in plant-herbivore and plant-pathogen interactions. *Trends in Ecology & Evolution* **7**, 126–129.
- Marsch-Martinez N, Reyes-Olalde JI, Ramos-Cruz D, Lozano-Sotomayor P, Zuniga-Mayo VM, de Folter S.** 2012. Hormones talking: does hormonal cross-talk shape the *Arabidopsis* gynoecium? *Plant Signal Behaviour* **7**, 1698–1701.
- Mathieu J, Warthmann N, Kuttner F, Schmid M.** 2007. Export of FT protein from phloem companion cells is sufficient for floral induction in *Arabidopsis*. *Current Biology* **17**, 1055–1060.
- Mauricio R.** 2005. Ontogenetics of QTL: the genetic architecture of trichome density over time in *Arabidopsis thaliana*. *Genetica* **123**, 75–85.
- Michaels SD, Himelblau E, Kim SY, Schomburg FM, Amasino RM.** 2005. Integration of flowering signals in winter-annual *Arabidopsis*. *Plant Physiology* **137**, 149–156.
- Mitchum MG, Yamaguchi S, Hanada A, Kuwahara A, Yoshioka Y, Kato T, Tabata S, Kamiya Y, Sun TP.** 2006. Distinct and overlapping roles of two gibberellin 3-oxidases in *Arabidopsis* development. *Plant Journal* **45**, 804–818.
- Moon J, Suh SS, Lee H, Choi KR, Hong CB, Paek NC, Kim SG, Lee I.** 2003. The SOC1 MADS-box gene integrates vernalization and gibberellin signals for flowering in *Arabidopsis*. *Plant Journal* **35**, 613–623.
- Mutasa-Göttgens E, Hedden P.** 2009. Gibberellin as a factor in floral regulatory networks. *Journal of Experimental Botany* **60**, 1979–1989.
- Nemhauser JL, Hong F, Chory J.** 2006. Different plant hormones regulate similar processes through largely nonoverlapping transcriptional responses. *Cell* **126**, 467–475.
- Nilsson O, Lee I, Blázquez MA, Weigel D.** 1998. Flowering-time genes modulate the response to LEAFY activity. *Genetics* **150**, 403–410.
- Olsson ME, Olofsson LM, Lindahl AL, Lundgren A, Brodelius M, Brodelius PE.** 2009. Localization of enzymes of artemisinin biosynthesis to the apical cells of glandular secretory trichomes of *Artemisia annua* L. *Phytochemistry* **70**, 1123–1128.
- Olszewski N, Sun TP, Gubler F.** 2002. Gibberellin signaling: biosynthesis, catabolism, and response pathways. *Plant Cell* **14**, 61–80.
- Ó'Maoiléidigh DS, Wuest SE, Rae L, et al.** 2013. Control of reproductive floral organ identity specification in *Arabidopsis* by the C function regulator AGAMOUS. *Plant Cell* **25**, 2482–2503.
- Pattanaik S, Patra B, Singh SK, Yuan L.** 2014. An overview of the gene regulatory network controlling trichome development in the model plant, *Arabidopsis*. *Frontiers in Plant Science* **5**, 259.
- Payne CT, Zhang F, Lloyd AM.** 2000. GL3 encodes a bHLH protein that regulates trichome development in *Arabidopsis* through interaction with GL1 and TTG1. *Genetics* **156**, 1349–1362.
- Pelaz S, Ditta GS, Baumann E, Wisman E, Yanofsky MF.** 2000. B and C floral organ identity functions require SEPALLATA MADS-box genes. *Nature* **405**, 200–203.
- Pelaz S, Tapia-Lopez R, Alvarez-Buylla ER, Yanofsky MF.** 2001. Conversion of leaves into petals in *Arabidopsis*. *Current Biology* **11**, 182–184.
- Penfield S.** 2008. Temperature perception and signal transduction in plants. *New Phytologist* **179**, 615–628.
- Perazza D, Vachon G, Herzog M.** 1998. Gibberellins promote trichome formation by Up-regulating GLABROUS1 in *Arabidopsis*. *Plant Physiology* **117**, 375–383.
- Qi T, Huang H, Wu D, Yan J, Qi Y, Song S, Xie D.** 2014. *Arabidopsis* DELLA and JAZ proteins bind the WD-repeat/bHLH/MYB complex to modulate gibberellin and jasmonate signaling synergy. *Plant Cell* **26**, 1118–1133.
- Riechmann J, Krizek B, Meyerowitz E.** 1996. Dimerization specificity of *Arabidopsis* MADS domain homeotic proteins APETALA1, APETALA3, PISTILLATA, and AGAMOUS. *Proceedings of the National Academy of Sciences, USA* **93**, 4793–4798.
- Riou-Khamlichi C, Huntley R, Jacquard A, Murray JA.** 1999. Cytokinin activation of *Arabidopsis* cell division through a D-type cyclin. *Science* **283**, 1541–1544.
- Sakakibara H, Takei K, Hirose N.** 2006. Interactions between nitrogen and cytokinin in the regulation of metabolism and development. *Trends in Plant Science* **11**, 440–448.
- Savage NS, Walker T, Wieckowski Y, Schiefelbein J, Dolan L, Monk NA.** 2008. A mutual support mechanism through intercellular movement of CAPRICE and GLABRA3 can pattern the *Arabidopsis* root epidermis. *PLoS Biology* **6**, e235.
- Schellmann S, Schnittger A, Kirik V, Wada T, Okada K, Beermann A, Thumfahrt J, Jurgens G, Hülkamp M.** 2002. TRIPTYCHON and CAPRICE mediate lateral inhibition during trichome and root hair patterning in *Arabidopsis*. *EMBO Journal* **21**, 5036–5046.
- Schellmann S, Hülkamp M, Uhrig J.** 2007. Epidermal pattern formation in the root and shoot of *Arabidopsis*. *Biochemical Society Transactions* **35**, 146–148.
- Schnittger A, Jürgens G, Hülkamp M.** 1998. Tissue layer and organ specificity of trichome formation are regulated by GLABRA1 and TRIPTYCHON in *Arabidopsis*. *Development* **125**, 2283–2289.
- Searle I, He Y, Turck F, Vincent C, Fornara F, Krober S, Amasino RA, Coupland G.** 2006. The transcription factor FLC confers a flowering response to vernalization by repressing meristem competence and systemic signaling in *Arabidopsis*. *Genes & Development* **20**, 898–912.
- Silverstone AL, Ciampaglio CN, Sun T.** 1998. The *Arabidopsis* RGA gene encodes a transcriptional regulator repressing the gibberellin signal transduction pathway. *Plant Cell* **10**, 155–169.
- Smyth DR, Bowman JL, Meyerowitz EM.** 1990. Early flower development in *Arabidopsis*. *Plant Cell* **2**, 755–767.
- Song YH, Ito S, Imaizumi T.** 2013. Flowering time regulation: photoperiod- and temperature-sensing in leaves. *Trends in Plant Science* **18**, 575–583.
- Song YH, Lee I, Lee SY, Imaizumi T, Hong JC.** 2012. CONSTANS and ASYMMETRIC LEAVES 1 complex is involved in the induction of FLOWERING LOCUS T in photoperiodic flowering in *Arabidopsis*. *Plant Journal* **69**, 332–342.
- Sun L, Zhang A, Zhou Z, Zhao Y, Yan A, Bao S, Yu H, Gan Y.** 2015. GLABROUS INFLORESCENCE STEMS3 (GIS3) regulates trichome initiation and development in *Arabidopsis*. *New Phytologist* **206**, 220–230.
- Sun TP, Kamiya Y.** 1994. The *Arabidopsis* GA1 locus encodes the cyclase-ent-kaurene synthetase A of gibberellin biosynthesis. *Plant Cell* **6**, 1509–1518.
- Szymanski DB, Lloyd AM, Marks MD.** 2000. Progress in the molecular genetic analysis of trichome initiation and morphogenesis in *Arabidopsis*. *Trends in Plant Science* **5**, 214–219.
- Tague BW, Goodman HM.** 1995. Characterization of a family of *Arabidopsis* zinc finger protein cDNAs. *Plant Molecular Biology* **28**, 267–279.
- Takada S, Goto K.** 2003. Terminal flower2, an *Arabidopsis* homolog of heterochromatin protein1, counteracts the activation of flowering locus T by constans in the vascular tissues of leaves to regulate flowering time. *Plant Cell* **15**, 2856–2865.
- Tamaki S, Matsuo S, Wong HL, Yokoi S, Shimamoto K.** 2007. Hd3a protein is a mobile flowering signal in rice. *Science* **316**, 1033–1036.

- Telfer A, Bollman KM, Poethig RS.** 1997. Phase change and the regulation of trichome distribution in *Arabidopsis thaliana*. *Development* **124**, 645–654.
- Theissen G.** 2002. Secret life of genes. *Nature* **415**, 741.
- Thomas B.** 2006. Light signals and flowering. *Journal of Experimental Botany* **57**, 3387–3393.
- Tominaga R, Iwata M, Sano R, Inoue K, Okada K, Wada T.** 2008. *Arabidopsis* CAPRICE-LIKE MYB 3 (CPL3) controls endoreduplication and flowering development in addition to trichome and root hair formation. *Development* **135**, 1335–1345.
- Traw MB, Bergelson J.** 2003. Interactive effects of jasmonic acid, salicylic acid, and gibberellin on induction of trichomes in *Arabidopsis*. *Plant Physiology* **133**, 1367–1375.
- Tyler L, Thomas SG, Hu J, Dill A, Alonso JM, Ecker JR, Sun TP.** 2004. DELLA proteins and gibberellin-regulated seed germination and floral development in *Arabidopsis*. *Plant Physiology* **135**, 1008–1019.
- Wada T, Kurata T, Tominaga R, Koshino-Kimura Y, Tachibana T, Goto K.** 2002. Role of a positive regulator of root hair development, CAPRICE, in *Arabidopsis* root epidermal cell differentiation. *Development* **129**, 5409–5419.
- Wada T, Tachibana T, Shimura Y, Okada K.** 1997. Epidermal cell differentiation in *Arabidopsis* determined by a Myb homolog, CPC. *Science* **277**, 1113–1116.
- Wang JW, Czech B, Weigel D.** 2009. miR156-regulated SPL transcription factors define an endogenous flowering pathway in *Arabidopsis thaliana*. *Cell* **138**, 738–749.
- Wang S, Kwak SH, Zeng Q, Ellis BE, Chen XY, Schiefelbein J, Chen JG.** 2007. TRICHOMELESS1 regulates trichome patterning by suppressing GLABRA1 in *Arabidopsis*. *Development* **134**, 3873–3882.
- Wang S, Chen JG.** 2014. Regulation of cell fate determination by single-repeat R3 MYB transcription factors in *Arabidopsis*. *Frontiers in Plant Science* **8**, 133–138.
- Wellmer F, Alves-Ferreira M, Dubois A, Riechmann JL, Meyerowitz EM.** 2006. Genome-wide analysis of gene expression during early *Arabidopsis* flower development. *PLoS Genetics* **2**, e117.
- Wellmer F, Riechmann JL.** 2010. Gene networks controlling the initiation of flower development. *Trends in Genetics* **26**, 519–527.
- Wen CK, Chang C.** 2002. *Arabidopsis* RGL1 encodes a negative regulator of gibberellin responses. *Plant Cell* **14**, 87–100.
- Werner T, Hanus J, Holub J, Schmulling T, Van Onckelen H, Strnad M.** 2003. New cytokinin metabolites in IPT transgenic *Arabidopsis thaliana* plants. *Physiologia Plantarum* **118**, 127–137.
- Werner T, Kollmer I, Bartrina I, Holst K, Schmulling T.** 2006. New insights into the biology of cytokinin degradation. *Plant Biology* **8**, 371–381.
- Willmann MR, Poethig RS.** 2011. The effect of the floral repressor FLC on the timing and progression of vegetative phase change in *Arabidopsis*. *Development* **138**, 677–685.
- Wilson RN, Heckman JW, Somerville CR.** 1992. Gibberellin is required for flowering in *Arabidopsis thaliana* under short days. *Plant Physiology* **100**, 403–408.
- Wu G, Park MY, Conway SR, Wang JW, Weigel D, Poethig RS.** 2009. The sequential action of miR156 and miR172 regulates developmental timing in *Arabidopsis*. *Cell* **138**, 750–759.
- Wuest SE, Ó'Maoiléidigh DS, Rae L, Kwasniewska K, Raganelli A, Hanczaryk K, Lohan AJ, Loftus B, Graciet E, Wellmer F.** 2012. Molecular basis for the specification of floral organs by APETALA3 and PISTILLATA. *Proceedings of the National Academy of Sciences, USA* **109**, 13452–13457.
- Xue XY, Zhao B, Chao LM, Chen DY, Cui WR, Mao YB, Wang LJ, Chen XY.** 2014. Interaction between two timing microRNAs controls trichome distribution in *Arabidopsis*. *PLoS Genetics* **10**, e1004266.
- Yamaguchi A, Kobayashi Y, Goto K, Abe M, Araki T.** 2005. TWIN SISTER OF FT (TSF) acts as a floral pathway integrator redundantly with FT. *Plant and Cell Physiology* **46**, 1175–1189.
- Yan A, Pan J, An L, Gan Y, Feng H.** 2012. The responses of trichome mutants to enhanced ultraviolet-B radiation in *Arabidopsis thaliana*. *Journal of Photochemistry and Photobiology B* **113**, 29–35.
- Yanai O, Shani E, Dolezal K, Tarkowski P, Sablowski R, Sandberg G, Samach A, Ori N.** 2005. *Arabidopsis* KNOX1 proteins activate cytokinin biosynthesis. *Current Biology* **15**, 1566–1571.
- Yanofsky MF, Ma H, Bowman JL, Drews GN, Feldmann KA, Meyerowitz EM.** 1990. The protein encoded by the *Arabidopsis* homeotic gene *agamous* resembles transcription factors. *Nature* **346**, 35–39.
- Yu H, Ito T, Zhao Y, Peng J, Kumar P, Meyerowitz EM.** 2004. Floral homeotic genes are targets of gibberellin signaling in flower development. *Proceedings of the National Academy of Sciences, USA* **101**, 7827–7832.
- Yu N, Cai WJ, Wang S, Shan CM, Wang LJ, Chen XY.** 2010. Temporal control of trichome distribution by microRNA156-targeted SPL genes in *Arabidopsis thaliana*. *Plant Cell* **22**, 2322–2335.
- Yu S, Galvão VC, Zhang YC, Horrer D, Zhang TQ, Hao YH, Feng YQ, Wang S, Schmid M, Wang JW.** 2012. Gibberellin regulates the *Arabidopsis* floral transition through miR156-targeted SQUAMOSA promoter binding-like transcription factors. *Plant Cell* **24**, 3320–3332.
- Zhang F, Gonzalez A, Zhao M, Payne CT, Lloyd A.** 2003. A network of redundant bHLH proteins functions in all TTG1-dependent pathways of *Arabidopsis*. *Development* **130**, 4859–4869.
- Zhao M, Morohashi K, Hatlestad G, Grotewold E, Lloyd A.** 2008. The TTG1-bHLH-MYB complex controls trichome cell fate and patterning through direct targeting of regulatory loci. *Development* **135**, 1991–1999.
- Zhou Z, An L, Sun L, Zhu S, Xi W, Broun P, Yu H, Gan Y.** 2011. Zinc finger protein5 is required for the control of trichome initiation by acting upstream of zinc finger protein8 in *Arabidopsis*. *Plant Physiology* **157**, 673–682.
- Zhou Z, Sun L, Zhao Y, An L, Yan A, Meng X, Gan Y.** 2013. Zinc Finger Protein 6 (ZFP6) regulates trichome initiation by integrating gibberellin and cytokinin signaling in *Arabidopsis thaliana*. *New Phytologist* **198**, 699–708.
- Zhou Z, Sun L, Zhao Y, An L, Yan A, Meng X, Gan Y.** 2013. Zinc Finger Protein 6 (ZFP6) regulates trichome initiation by integrating gibberellin and cytokinin signaling in *Arabidopsis thaliana*. *New Phytologist* **198**, 699–708.
